# Supplementary material for: A robust nonlinear low-dimensional manifold for single cell RNA-seq data
Source: PubMed Central journal article supplement (PMC7374962; doi:10.1186/s12859-020-03625-z), 2020-07-21
Supplement: 12859_2020_3625_MOESM2_ESM.pdf [file 12859_2020_3625_MOESM2_ESM.pdf]

# 1 Supplementary Figures

## 1.1 Effect of Initialization on Clustering

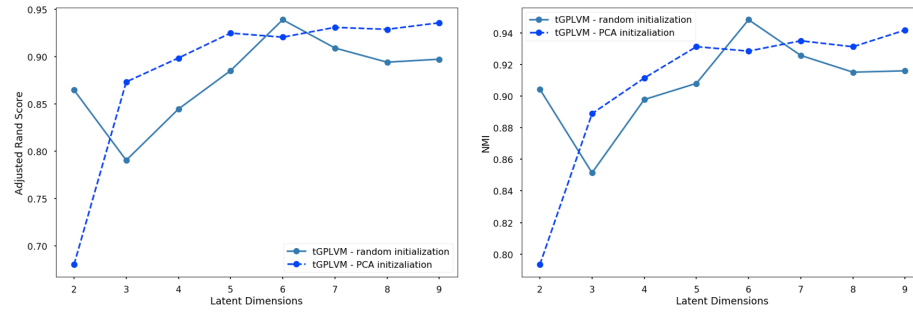

Figure 1: Black Box Variational Inference can be sensitive to initialization. As evaluated by NMI and Adjusted Rand Score we find that changing from a PCA initialization to random noise initialization does not greatly change clustering performance.
